# Supplementary material for: Comparative Analysis of Dietary and Physical Activity Behavior between Prediabetic and Normoglycemic Populations
Source: Research Square preprint supplement (doi:10.21203/rs.3.rs-5796923/v1), 2025-05-06
Supplement: Supplementary file 1 [file 4d3e1212fb5faf3928bc94a1.docx]

**Supplementary file 2. Physical activity in the preDM group and normoglycemic group (details)**

| **Variables** | | **Before PSM** | | | |  | **After PSM** | | | |
| --- | --- | --- | --- | --- | --- | --- | --- | --- | --- | --- |
| **Total (n = 453)** | **PreDM (n=151)** | **Normoglycemic**  **(n=302)** | ***p*-Value** |  | **Total (n = 235)** | **PreDM(n=87)** | **Normoglycemic**  **(n=148)** | ***p*-Value** |
| VPA1 | day, Median (Q1,Q3) | 0.00 (0.00, 1.00) | 0.00 (0.00, 0.00) | 0.00 (0.00, 2.00) | < 0.001 |  | 0.00 (0.00, 1.00) | 0.00 (0.00, 0.00) | 0.00 (0.00, 3.00) | < 0.001 |
| time, Median (Q1,Q3) | 0.00 (0.00, 5.00) | 0.00 (0.00, 0.00) | 0.00 (0.00, 10.00) | < 0.001 |  | 0.00 (0.00, 7.50) | 0.00 (0.00, 0.00) | 0.00 (0.00, 10.00) | < 0.001 |
| VPA2 | day, Median (Q1,Q3) | 0.00 (0.00, 0.00) | 0.00 (0.00, 0.00) | 0.00 (0.00, 0.00) | < 0.001 |  | 0.00 (0.00, 0.00) | 0.00 (0.00, 0.00) | 0.00 (0.00, 0.25) | < 0.001 |
| time, Median (Q1,Q3) | 0.00 (0.00, 0.00) | 0.00 (0.00, 0.00) | 0.00 (0.00, 0.00) | < 0.001 |  | 0.00 (0.00, 0.00) | 0.00 (0.00, 0.00) | 0.00 (0.00, 0.50) | < 0.001 |
| VPA3 | day, Median (Q1,Q3) | 0.00 (0.00, 2.00) | 0.00 (0.00, 2.00) | 0.00 (0.00, 1.00) | 0.023 |  | 0.00 (0.00, 1.00) | 0.00 (0.00, 2.00) | 0.00 (0.00, 1.00) | 0.107 |
| time, Median (Q1,Q3) | 0.00 (0.00, 30.00) | 0.00 (0.00, 30.00) | 0.00 (0.00, 30.00) | 0.010 |  | 0.00 (0.00, 30.00) | 0.00 (0.00, 30.00) | 0.00 (0.00, 20.00) | 0.074 |
| MPA1 | day, Median (Q1,Q3) | 0.00 (0.00, 2.00) | 0.00 (0.00, 0.00) | 0.00 (0.00, 3.00) | < 0.001 |  | 0.00 (0.00, 2.00) | 0.00 (0.00, 0.00) | 1.00 (0.00, 3.00) | < 0.001 |
| time, Median (Q1,Q3) | 0.00 (0.00, 10.00) | 0.00 (0.00, 0.00) | 0.00 (0.00, 15.00) | < 0.001 |  | 0.00 (0.00, 10.00) | 0.00 (0.00, 0.00) | 2.00 (0.00, 20.00) | < 0.001 |
| MPA2 | day, Median (Q1,Q3) | 0.00 (0.00, 0.00) | 0.00 (0.00, 0.00) | 0.00 (0.00, 0.00) | 0.591 |  | 0.00 (0.00, 0.00) | 0.00 (0.00, 0.50) | 0.00 (0.00, 0.00) | 0.577 |
| time, Median (Q1,Q3) | 0.00 (0.00, 0.00) | 0.00 (0.00, 0.00) | 0.00 (0.00, 0.00) | 0.713 |  | 0.00 (0.00, 0.00) | 0.00 (0.00, 5.00) | 0.00 (0.00, 0.00) | 0.422 |
| MPA3 | day, Median (Q1,Q3) | 0.00 (0.00, 2.00) | 0.00 (0.00, 0.00) | 1.00 (0.00, 3.00) | < 0.001 |  | 0.00 (0.00, 2.00) | 0.00 (0.00, 0.00) | 1.00 (0.00, 3.00) | < 0.001 |
| time, Median (Q1,Q3) | 0.00 (0.00, 15.00) | 0.00 (0.00, 0.00) | 10.00 (0.00, 20.00) | < 0.001 |  | 0.00 (0.00, 15.00) | 0.00 (0.00, 0.00) | 10.00 (0.00, 20.00) | < 0.001 |
| MPA4 | day, Median (Q1,Q3) | 2.00 (1.00, 5.00) | 2.00 (0.00, 5.00) | 2.00 (1.00, 5.00) | 0.323 |  | 2.00 (1.00, 5.00) | 2.00 (0.50, 5.00) | 3.00 (1.00, 5.00) | 0.110 |
| time, Median (Q1,Q3) | 15.00 (10.00, 30.00) | 20.00 (0.00, 30.00) | 15.00 (10.00, 30.00) | 0.002 |  | 20.00 (10.00, 30.00) | 30.00 (5.00, 60.00) | 15.00 (10.00, 30.00) | 0.002 |
| MPA5 | day, Median (Q1,Q3) | 0.00 (0.00, 0.00) | 0.00 (0.00, 0.00) | 0.00 (0.00, 0.00) | 0.927 |  | 0.00 (0.00, 0.00) | 0.00 (0.00, 0.00) | 0.00 (0.00, 0.00) | 0.225 |
| time, Median (Q1,Q3) | 0.00 (0.00, 0.00) | 0.00 (0.00, 0.00) | 0.00 (0.00, 0.00) | 0.784 |  | 0.00 (0.00, 0.00) | 0.00 (0.00, 0.00) | 0.00 (0.00, 0.00) | 0.303 |
| LPA1 | day, Median (Q1,Q3) | 5.00 (1.00, 5.00) | 3.00 (0.00, 5.00) | 5.00 (2.25, 5.00) | < 0.001 |  | 5.00 (1.00, 5.00) | 3.00 (0.00, 5.00) | 5.00 (2.75, 5.00) | 0.003 |
| time, Median (Q1,Q3) | 20.00 (10.00, 35.00) | 15.00 (0.00, 60.00) | 20.00 (10.00, 30.00) | 0.040 |  | 20.00 (10.00, 60.00) | 20.00 (0.00, 60.00) | 20.00 (10.00, 40.00) | 0.128 |
| LPA2 | day, Median (Q1,Q3) | 4.00 (0.00, 5.00) | 5.00 (0.00, 5.00) | 3.00 (0.00, 5.00) | 0.014 |  | 3.00 (0.00, 5.00) | 5.00 (0.50, 5.00) | 2.50 (0.00, 5.00) | 0.189 |
| time, Median (Q1,Q3) | 20.00 (0.00, 40.00) | 30.00 (0.00, 60.00) | 15.00 (0.00, 31.50) | < 0.001 |  | 20.00 (0.00, 45.00) | 30.00 (3.00, 60.00) | 15.00 (0.00, 40.00) | 0.006 |
| LPA3 | day, Median (Q1,Q3) | 5.00 (2.00, 7.00) | 5.00 (2.00, 7.00) | 5.00 (2.00, 6.00) | 0.027 |  | 5.00 (2.00, 7.00) | 5.00 (2.50, 7.00) | 5.00 (1.00, 6.25) | 0.049 |
| time, Median (Q1,Q3) | 20.00 (10.00, 30.00) | 30.00 (10.00, 55.00) | 16.00 (10.00, 30.00) | < 0.001 |  | 20.00 (10.00, 30.00) | 30.00 (12.60, 60.00) | 15.00 (10.00, 30.00) | < 0.001 |
| LPA4 | day, Median (Q1,Q3) | 2.00 (0.00, 5.00) | 3.00 (0.00, 5.00) | 2.00 (0.00, 5.00) | 0.462 |  | 2.00 (0.00, 4.50) | 2.00 (0.00, 5.00) | 2.00 (1.00, 3.00) | 0.400 |
| time, Median (Q1,Q3) | 20.00 (0.00, 30.00) | 30.00 (0.00, 60.00) | 20.00 (0.00, 30.00) | 0.159 |  | 20.00 (0.00, 30.00) | 20.00 (0.00, 40.00) | 20.00 (10.00, 30.00) | 0.379 |
| VPA_MET, Median (Q1,Q3) | | 160.00 (0.00, 960.00) | 160.00 (0.00, 1280.00) | 160.00 (0.00, 870.00) | 0.850 |  | 96.00 (0.00, 792.00) | 0.00 (0.00, 720.00) | 136.00 (0.00, 810.00) | 0.482 |
| MPA_MET, Median (Q1,Q3) | | 480.00 (200.00, 1040.00) | 480.00 (120.00, 1200.00) | 550.00 (240.00, 1012.00) | 0.513 |  | 480.00 (200.00, 1110.00) | 480.00 (170.00, 1090.00) | 560.00 (215.00, 1105.00) | 0.560 |
| LPA_MET, Median (Q1,Q3) | | 1386.00 (726.00, 2475.00) | 2013.00 (1072.50, 3399.00) | 1122.00 (627.00, 1980.00) | < 0.001 |  | 1452.00 (750.75, 2772.00) | 2079.00 (1155.00, 3184.50) | 1138.50 (639.38, 2087.25) | < 0.001 |
| total_MET, Median (Q1,Q3) | | 2623.00 (1506.00, 4402.00) | 3111.50 (1970.00, 5878.50) | 2478.00 (1400.88, 4011.38) | < 0.001 |  | 2727.00 (1460.75, 4761.00) | 3066.00 (1873.50, 5672.00) | 2516.25 (1383.88, 4406.62) | 0.039 |
| VPA_day_total, Median (Q1,Q3) | | 1.00 (0.00, 5.00) | 1.00 (0.00, 4.00) | 1.00 (0.00, 5.00) | 0.116 |  | 1.00 (0.00, 5.00) | 0.00 (0.00, 3.00) | 1.00 (0.00, 5.00) | 0.032 |
| MPA_day_total, Median (Q1,Q3) | | 7.00 (2.00, 11.00) | 5.00 (1.00, 9.00) | 7.00 (3.00, 11.00) | < 0.001 |  | 7.00 (2.00, 11.00) | 4.00 (1.00, 8.50) | 7.50 (3.00, 11.25) | < 0.001 |
| LPA_day_total, Median (Q1,Q3) | | 14.00 (9.00, 18.00) | 14.00 (10.00, 18.00) | 13.50 (9.00, 17.00) | 0.614 |  | 13.53 ± 6.04 | 13.50 ± 6.06 | 13.55 ± 6.04 | 0.954 |
| MET_day_total, Median (Q1,Q3) | | 23.00 (16.00, 29.00) | 21.00 (14.00, 28.00) | 24.00 (17.00, 29.75) | 0.037 |  | 23.00 (15.00, 29.00) | 19.00 (12.50, 28.00) | 24.00 (17.00, 29.25) | 0.029 |
| MET_group, n (%) | |  |  |  | 0.029 |  |  |  |  | 0.315 |
| Low | | 177 (39.1) | 72 (47.7) | 105 (34.8) |  |  | 91 (38.7) | 39 (44.8) | 52 (35.1) |  |
| Moderate | | 252 (55.6) | 72 (47.7) | 180 (59.6) |  |  | 131 (55.7) | 43 (49.4) | 88 (59.5) |  |
| High | | 24 (5.3) | 7 (4.6) | 17 (5.6) |  |  | 13 (5.5) | 5 (5.7) | 8 (5.4) |  |

Note：VPA1 means vigorous physical activity at work; VPA2 means vigorous physical activity during housework; VPA3 means vigorous physical activity during leisure time physical exercise; MPA1 means moderate physical activity at work; MPA2 means moderate physical activity during traffic; MPA3 means moderate physical activity during housework, such as carrying or lifting light objects and sweeping the yard, etc; MPA4 means moderate physical activity during housework, such as washing windows and washing clothes by hand, etc; MPA5 means moderate physical activity during leisure time physical exercise; LPA1 means light physical activity at work; LPA2 means light physical activity during traffic, such as by trains, buses, or cars (taxi); LPA3 means light physical activity during traffic, such as walking; LPA4 means light physical activity during leisure time physical exercise; Because the data after PSM for this part of LPA_day_total conforms to a normal distribution, this part is described in the table using Mean ± SD.
