# Supplementary material for: Comparative Analysis of Dietary and Physical Activity Behavior between Prediabetic and Normoglycemic Populations
Source: Research Square preprint supplement (doi:10.21203/rs.3.rs-5796923/v1), 2025-05-06
Supplement: Supplementary file 2 [file aec7e913b62d92637e13cd60.docx]

**Supplementary file 1. Criteria for score distribution based on Planetary Health Diet**

| **Dietary components** | **Original intake (range) of the PHD components, for an intake of 2500 kcal/day** | **Criteria for score distribution based on PHD (g/2500 kcal)** | | | | |
| --- | --- | --- | --- | --- | --- | --- |
| **Minimum score**  **(0 points)** | **Proportional score**  **(0~10 points)** | **Maximum score (10 points)** | **Proportional score**  **(10~0 points)** | **Minimum score**  **(0 points)** |
| **Total grains** |  |  |  |  |  |  |
| 1. Rice, wheat, corn, and other | 232 (total grains 0~ 60% of energy) g/day |  |  | ≤232 | 232~464 | ≥464 |
| **Tubers of starchy vegetables** |  |  |  |  |  |  |
| 1. Potatoes and cassava | 50 (0~100) g/day | 0 | 0~50 | 50 | 50~100 | ≥100 |
| **Vegetables** |  |  |  |  |  |  |
| 1. All vegetables (dark green vegetables, red and orange vegetables, other vegetables) | 300 (200~600) g/day | 0 | 0~300 | ≥300 |  |  |
| **Fruit** |  |  |  |  |  |  |
| 1. All fruits | 200 (100~300) g/day | 0 | 0~200 | ≥200 |  |  |
| **Dairy foods** |  |  |  |  |  |  |
| 1. Whole milk or derivative equivalents | 250 (0~500) g/day | 0 | 0~250 | 250 | 250~500 | ≥500 |
| **Protein sources** |  |  |  |  |  |  |
| 1. Beef, lamb, pork | 14 (0~28) g/day |  |  | ≤14 | 14~28 | ≥28 |
| 1. Chicken and other poultry | 29 (0~58) g/day | 0 | 0~29 | 29 | 29~58 | ≥58 |
| 1. Eggs | 13 (0~25) g/day | 0 | 0~13 | 13 | 13~25 | ≥25 |
| 1. Fish | 28 (0~100) g/day | 0 | 0~28 | ≥28 |  |  |
| **Legumes** |  |  |  |  |  |  |
| 1. Dry beans, lentils, peas, soy foods | 75 (0~150) g/day | 0 | 0~75 | ≥75 |  |  |
| 1. Peanuts or tree nuts | 50 (0~75) g/day | 0 | 0~50 | ≥50 |  |  |
| **Added fats** |  |  |  |  |  |  |
| 1. Animal oils | 11.8 (0~11.8) g/day |  |  | 0 | 0~11.8 | ≥11.8 |
| 1. Unsaturated oils | 40 (20~80) g/day | 0 | 0~40 | ≥40 |  |  |
| **Added sugar** |  |  |  |  |  |  |
| 1. All sweeteners | 31 (0~31) g/day |  |  | 0 | 0~31 | ≥31 |
